# Supplementary material for: Gut microbiota analyses of Saudi populations for type 2 diabetes-related phenotypes reveals significant association
Source: PubMed Central journal article supplement (PMC9746012; doi:10.1186/s12866-022-02714-8), 2022-12-13

**Fig. S1** Data processing and analysis pipeline for Saudi T2D 16S microbiota study

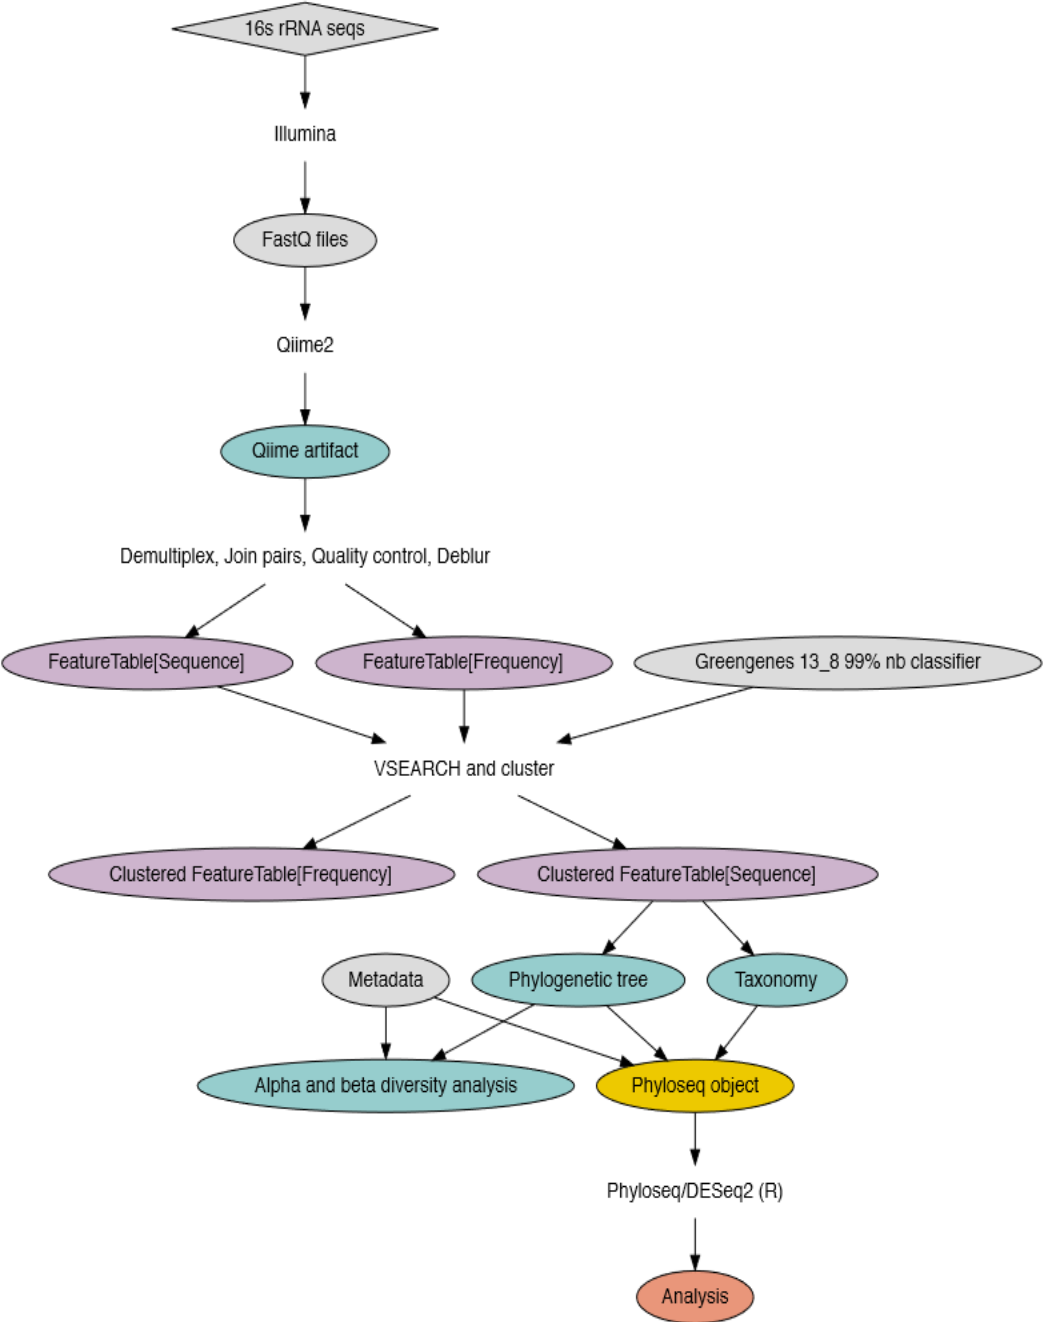

Supplement: 12866_2022_2714_MOESM1_ESM.pdf [file 12866_2022_2714_MOESM1_ESM.pdf]
